# Supplementary material
Source: publisher figshare collection journal article supplement (https://acs.figshare.com/ndownloader/files/4261087)
Supplement: Supplementary file 1 [file 4261087]

Archive with 4 entries (3 files):
- software/
- software/Gene.txt
- software/manual.pdf
- software/software.m
