# Supplementary material
Source: publisher figshare collection journal article supplement (https://acs.figshare.com/ndownloader/files/4261087)
Supplement: Supplementary file 1 [file 4261087 › software/Gene.txt]

0	1	1	1	1	1	1	2	2	2	2	2	2	3	3	3	3	3	3
0	-1	-1	0	0	1	1	-1	-1	0	0	1	1	-1	-1	0	0	1	1
0	1	0	1	0	1	0	1	0	1	0	1	0	1	0	1	0	1	0
1	2	0	1	0	0	0	0	0	1	0	1	0	1	1	0	1	1	1
2	2	1	1	0	0	0	1	1	1	1	0	0	1	2	1	1	1	0
3	3	0	1	0	0	0	2	0	2	0	1	1	2	0	2	0	2	0
4	0	3	1	0	0	0	0	3	1	1	0	0	1	3	5	2	0	0
5	0	7	1	2	2	1	2	3	2	2	2	2	1	2	2	2	1	0
6	1	0	3	1	1	0	0	0	1	1	1	0	2	0	0	2	3	0
7	1	0	3	0	1	0	1	0	3	0	0	1	1	2	3	1	0	1
8	1	0	3	0	1	1	0	0	1	0	1	1	1	1	2	1	1	2
9	2	0	4	0	0	0	2	1	1	1	0	1	2	2	2	2	1	2
10	1	0	5	2	0	0	2	0	7	2	1	0	1	0	7	6	1	0
11	4	0	6	0	1	0	4	1	6	2	1	1	1	2	3	3	3	2
12	6	0	7	1	1	1	3	1	4	9	0	1	3	1	4	2	0	1
13	3	0	12	2	1	0	3	1	7	2	1	0	2	5	6	4	4	2
14	1	1	14	0	2	1	1	2	10	0	2	1	2	2	10	0	2	1
15	1	1	0	3	0	0	1	2	0	3	0	0	0	4	1	4	0	1
16	0	0	1	3	1	3	0	1	1	2	1	2	1	2	1	2	3	2
17	3	3	1	3	1	4	3	2	2	3	0	1	3	3	2	6	0	3
18	0	0	4	3	1	0	1	2	3	5	1	1	0	2	3	5	1	1
19	0	6	3	3	1	0	1	3	1	2	2	0	1	3	4	5	3	1
20	1	0	2	3	1	0	1	1	3	3	2	1	2	4	3	3	2	1
21	6	1	20	4	0	4	3	1	10	5	0	4	3	1	5	4	1	4
22	0	0	1	4	0	1	0	0	5	4	1	1	1	1	5	4	1	2
23	3	3	7	4	4	1	2	2	7	2	4	1	2	2	8	4	4	1
24	1	0	1	4	6	1	1	1	2	4	3	0	3	2	2	4	4	1
25	4	4	6	4	4	1	2	3	6	3	4	1	2	3	16	5	4	1
26	1	1	0	4	0	1	1	1	1	5	1	1	0	4	1	5	1	1
27	4	1	19	4	3	0	3	1	19	3	4	1	3	2	22	6	4	2
28	1	1	0	4	3	0	1	1	0	2	3	0	0	2	2	2	5	0
29	2	6	6	5	6	2	2	4	6	5	5	2	2	5	6	8	5	2
30	2	6	6	5	6	2	2	4	6	4	6	2	1	5	5	4	6	1
31	5	0	3	5	5	0	2	0	3	5	1	0	2	2	3	3	3	0
32	0	1	3	5	0	0	1	2	1	3	1	0	2	2	3	3	1	0
33	0	7	3	5	2	3	1	5	4	5	0	3	0	5	4	8	0	1
34	4	2	13	5	3	3	2	2	5	3	3	1	2	3	3	5	4	1
35	1	2	6	5	2	0	1	1	7	5	2	0	2	1	7	10	2	0
36	2	6	6	5	7	2	2	4	6	3	5	2	2	4	8	3	5	2
37	1	1	5	6	1	4	1	1	3	6	1	2	3	2	3	9	2	1
38	1	2	1	6	2	1	1	1	4	10	2	0	1	1	8	10	2	0
39	3	0	4	6	1	2	3	0	4	3	0	2	1	2	4	6	0	1
40	3	0	3	6	1	1	3	1	2	3	1	0	3	1	1	3	2	0
41	4	2	1	7	0	2	3	2	1	6	0	2	1	2	1	8	0	2
42	4	3	5	7	12	19	4	3	5	5	10	15	4	4	7	5	10	10
43	2	4	3	7	1	3	2	3	4	6	1	3	0	3	4	8	1	2
44	2	3	4	8	2	3	2	3	3	3	2	1	2	0	0	3	2	1
45	5	2	4	8	4	0	4	2	5	5	2	0	1	2	5	8	3	0
46	4	4	1	9	5	0	4	4	2	5	4	1	4	4	4	5	4	0
47	5	2	4	8	4	1	4	2	6	9	3	1	1	4	6	10	3	1
48	7	3	10	9	9	2	5	3	9	9	6	1	5	3	7	9	6	1
49	7	2	10	10	4	1	6	3	5	7	2	1	3	6	5	10	5	0
50	5	2	5	10	1	2	4	2	5	8	1	1	0	2	10	8	1	1
51	3	2	10	11	3	1	1	2	8	10	2	3	2	4	8	12	1	2
52	4	4	1	11	2	1	4	4	2	8	2	2	4	2	5	8	2	2
53	6	17	15	17	20	9	5	15	12	12	18	10	10	20	15	16	10	5
54	5	20	14	21	24	27	4	15	10	18	18	20	10	15	10	18	18	10
55	3	7	21	21	11	5	5	4	20	16	8	4	5	5	22	18	4	2
56	14	6	22	21	15	7	13	5	14	17	10	4	13	6	14	17	10	4
57	14	7	22	22	15	7	12	6	12	18	10	5	14	8	14	20	8	2
