# Supplementary material
Source: publisher figshare collection journal article supplement (https://acs.figshare.com/ndownloader/files/4261087)
Supplement: Supplementary file 1 [file 4261087 › software/manual.pdf]

## Manual

This code produce 5 graph for comparing different Genes in different cells and in presence different nanoparticles.

At first, two files as known “table.txt” and “code.m” copy on your system. “table.txt” file is nessessary for runing code.

Please run code.m file. In command window is asked several question.

Question 1 : “ ID of Gene 1 = ”

explain: you should select ID of Gene (ID number of each Gene shows in Table1). For each Gene exist an ID number.

If you select a integer number except 1-57, you would face follow error:

“please select a number between 1 and 57”

Question 2 : “ID of Cell (ID: Heart cell=1 , Brain Cell=2 kidney Cell=3 )=”

explain: you select ID of Gene in previous step, now we want to see Gene in one of Heart cell, Kidney cell or Brain cell. ID of Heart, Brain, Kidney cell is 1, 2, 3 respectively.

If you select a integer number except 1, 2, 3 , you would face follow error:

“please select one of numbers of 1 or 2 or 3”

Question 3: “ID of Nanoparticle (ID: SPIONs-COOH=-1, SPIONs=0, va SPIONs-NH2=1) =”

Now we want to see effect of nanoparticle on Gene. Here, there is 3 nanoparticle (SPIONs-COOH, SPIONs, SPIONs-NH2). Each nanoparticle has an ID number as follow:

SPIONs-COOH = -1,

SPIONs = 0,

SPIONs-NH2 = 1

If you select a integer number except 1, 0, -1 , you would face follow error:

“please select one of numbers of 1 or 0 or -1”

Three questions are asked 5 times. Now you can compare 5 different Genes in different Cells and in presence of different nanoparticles.

| Number | Name of Gene Series                                   |
|--------|-------------------------------------------------------|
| 1      | Homeostasis                                           |
| 2      | Nitrogen compound biosynthesis                        |
| 3      | Wound healing                                         |
| 4      | DNA repair                                            |
| 5      | M phase                                               |
| 6      | Secretion                                             |
| 7      | Negative regulation of metabolism                     |
| 8      | Inflammatory response                                 |
| 9      | Human immune response                                 |
| 10     | Ion transport                                         |
| 11     | Response to pest, pathogen or parasite                |
| 12     | Immune response                                       |
| 13     | Alcohol metabolism                                    |
| 14     | Lipid biosynthesis                                    |
| 15     | Aromatic compound metabolism                          |
| 16     | Vesicle-mediated transport                            |
| 17     | Regulation of cell proliferation                      |
| 18     | Sensory perception                                    |
| 19     | Mitotic cell cycle                                    |
| 20     | Regulation of protein metabolism                      |
| 21     | Lipid metabolism                                      |
| 22     | Cell motility                                         |
| 23     | Establishment of protein localization                 |
| 24     | Cellular morphogenesis                                |
| 25     | Protein transport                                     |
| 26     | Regulation of signal transduction                     |
| 27     | Cellular lipid metabolism                             |
| 28     | Nitrogen compound catabolism                          |
| 29     | Establishment of cellular localization                |
| 30     | Cellular localization                                 |
| 31     | Macromolecule biosynthesis                            |
| 32     | Cofactor metabolism                                   |
| 33     | Organelle organization and biogenesis                 |
| 34     | Negative regulation of cellular physiological process |
| 35     | Electron transport                                    |
| 36     | Intracellular transport                               |
| 37     | Cell surface receptor linked signal transduction      |
| 38     | Macromolecule catabolism                              |
| 39     | Carbohydrate metabolism                               |
| 40     | Regulation of programmed cell death                   |
| 41     | Positive regulation of cellular physiological process |
| 42     | Regulation of cellular metabolism                     |
| 43     | Regulation of cell cycle                              |
| 44     | Phosphorus metabolism                                 |
| 45     | Amino acid and derivative metabolism                  |

|    |                                                |
|----|------------------------------------------------|
| 46 | Intracellular signaling cascade                |
| 47 | Amine metabolism                               |
| 48 | Cellular biosynthesis                          |
| 49 | Organic acid metabolism                        |
| 50 | Programmed cell death                          |
| 51 | Generation of precursor metabolites and energy |
| 52 | Cellular catabolism                            |
| 53 | Biopolymer metabolism                          |
| 54 | Nucleic acid metabolism                        |
| 55 | Transport                                      |
| 56 | Protein Metabolism                             |
| 57 | Cellular Macromolecule metabolism              |

Table1: ID number of 57 Genes.
