# Supplementary material
Source: publisher figshare collection journal article supplement (https://acs.figshare.com/ndownloader/files/4261087)
Supplement: Supplementary file 1 [file 4261087 › software/software.m]

%%%%%%%%%%%%%%%%%%%%%%%%%%%%%%%%%%%%%%%%%%%%%%%%%%
%%%%%                                        %%%%%
%%%%%    please select title for code        %%%%%
%%%%%                                        %%%%%   
%%%%%                                        %%%%%
%%%%%                                        %%%%%
%%%%%%%%%%%%%%%%%%%%%%%%%%%%%%%%%%%%%%%%%%%%%%%%%%


clc
clear all

A=load('Gene.txt');
y1=0;
z1=0;
x=0;
counter=0;
% number1
NameofGene=input('ID of Gene 1 =');
if(NameofGene<1||NameofGene>57)
error('please select a number between 1 and 57')
end

NameofCell=input('ID of Cell (ID: Heart cell=1 , Brain Cell=2 kidney Cell=3 )=');
if ((NameofCell<1)||(NameofCell>3))
    error('please select one of numbers of 1 or 2 or 3')
end

NameofNanoparticle=input('ID of Nanoparticle (ID: SPIONs-COOH=-1, SPIONs=0, va SPIONs-NH2=1) =');
 if (NameofNanoparticle>1||NameofNanoparticle<-1)  
      error('please select one of numbers of 1 or 0 or -1')
 end 
    
    
    for j=4:60
          
        if(NameofGene==A(j,1))
           m=j;
           
            for i=2:19
                if(counter==0)
                 if(NameofCell==A(1,i)&&NameofNanoparticle==A(2,i))
     
            z1=A(m,i+1);
            y1=A(m,i);
            counter=counter+1;
                 end 
                end
           end
      end
      end
     bar(1,y1,0.2,'r');
     axis([0 6 0 30])
     hold on;
     bar(1.1,z1,0.2,'b');
     axis([0 6 0 30])
     legend('Repressed','Induced')
     grid minor
     hold on;        

     
counter=0;
% number2
NameofGene=input('ID of Gene 2 =');
if(NameofGene<1||NameofGene>57)
error('please select a number between 1 and 57')
end

NameofCell=input('ID of Cell (ID: Heart cell=1 , Brain Cell=2 kidney Cell=3 )=');
if ((NameofCell<1)||(NameofCell>3))
    error('please select one of numbers of 1 or 2 or 3')
end

NameofNanoparticle=input('ID of Nanoparticle (ID: SPIONs-COOH=-1, SPIONs=0, va SPIONs-NH2=1) =');
if (NameofNanoparticle>1||NameofNanoparticle<-1)  
      error('please select one of numbers of 1 or 0 or -1')
 end      
     for j=4:60
          
          if(NameofGene==A(j,1))
           m=j;
           
            for i=2:19
                if(counter==0)
                 if(NameofCell==A(1,i)&&NameofNanoparticle==A(2,i))
     
            z1=A(m,i+1);
            y1=A(m,i);
            counter=counter+1;
                 end 
                end
            end
          end
      end
     bar(2,y1,0.2,'r');
     axis([0 6 0 30])
     hold on;
     bar(2.1,z1,0.2,'b');
     axis([0 6 0 30])
     hold on;    

counter=0;             
%number3             
NameofGene=input('ID of Gene 3 =');
if(NameofGene<1||NameofGene>57)
error('please select a number between 1 and 57')
end

NameofCell=input('ID of Cell (ID: Heart cell=1 , Brain Cell=2 kidney Cell=3 )=');
if ((NameofCell<1)||(NameofCell>3))
    error('please select one of numbers of 1 or 2 or 3')
end

NameofNanoparticle=input('ID of Nanoparticle (ID: SPIONs-COOH=-1, SPIONs=0, va SPIONs-NH2=1) =');
if (NameofNanoparticle>1||NameofNanoparticle<-1)  
      error('please select one of numbers of 1 or 0 or -1')
 end 
for j=4:60
          
          if(NameofGene==A(j,1))
           m=j;
           
            for i=2:19
                if(counter==0)
                 if(NameofCell==A(1,i)&&NameofNanoparticle==A(2,i))
     
            z1=A(m,i+1);
            y1=A(m,i);
            counter=counter+1;
                 end 
                end
            end
          end
      end
     bar(3,y1,0.2,'r');
     axis([0 6 0 30])
     hold on;
     bar(3.1,z1,0.2,'b');
     axis([0 6 0 30])
     hold on;
     
counter=0;
%number4             
NameofGene=input('ID of Gene 4 =');
if(NameofGene<1||NameofGene>57)
error('please select a number between 1 and 57')
end

NameofCell=input('ID of Cell (ID: Heart cell=1 , Brain Cell=2 kidney Cell=3 )=');
if ((NameofCell<1)||(NameofCell>3))
    error('please select one of numbers of 1 or 2 or 3')
end

NameofNanoparticle=input('ID of Nanoparticle (ID: SPIONs-COOH=-1, SPIONs=0, va SPIONs-NH2=1) =');
if (NameofNanoparticle>1||NameofNanoparticle<-1)  
      error('please select one of numbers of 1 or 0 or -1')
 end 
for j=4:60
          
          if(NameofGene==A(j,1))
           m=j;
           
            for i=2:19
                if(counter==0)
                 if(NameofCell==A(1,i)&&NameofNanoparticle==A(2,i))
      
            z1=A(m,i+1);
            y1=A(m,i);
            counter=counter+1;
                 end 
                end
            end
          end
      end
     bar(4,y1,0.2,'r');
     axis([0 6 0 30])
     hold on;
     bar(4.1,z1,0.2,'b');
     axis([0 6 0 30])
     hold on;    

counter=0;          
%number5             
NameofGene=input('ID of Gene 5 =');
if(NameofGene<1||NameofGene>57)
error('please select a number between 1 and 57')
end

NameofCell=input('ID of Cell (ID: Heart cell=1 , Brain Cell=2 kidney Cell=3 )=');
if ((NameofCell<1)||(NameofCell>3))
    error('please select one of numbers of 1 or 2 or 3')
end

NameofNanoparticle=input('ID of Nanoparticle (ID: SPIONs-COOH=-1, SPIONs=0, va SPIONs-NH2=1) =');
if (NameofNanoparticle>1||NameofNanoparticle<-1)  
      error('please select one of numbers of 1 or 0 or -1')
 end    
for j=4:60
          
          if(NameofGene==A(j,1))
           m=j;
           
            for i=2:19
                if(counter==0)
                 if(NameofCell==A(1,i)&&NameofNanoparticle==A(2,i))
     
                  z1=A(m,i+1);
                  y1=A(m,i);
                  counter=counter+1;
                 end 
                end
            end
           end
      end
     bar(5,y1,0.2,'r');
     axis([0 6 0 30])
     hold on;
     bar(5.1,z1,0.2,'b');
     axis([0 6 0 30])
     hold on;    
